# Supplementary material for: Diverse meibum lipids produced by Awat1 and Awat2 are important for stabilizing tear film and protecting the ocular surface
Source: PubMed Central journal article supplement (PMC8169949; doi:10.1016/j.isci.2021.102478), 2021-04-26
Supplement: mmc1.pdf [file mmc1.pdf]

iScience, Volume 24

## **Supplemental information**

**Diverse meibum lipids produced by**

**Awat1 and Awat2 are important for stabilizing tear film**

**and protecting the ocular surface**

**Megumi Sawai, Keisuke Watanabe, Kana Tanaka, Wataru Kinoshita, Kento Otsuka, Masatoshi Miyamoto, Takayuki Sassa, and Akio Kihara**

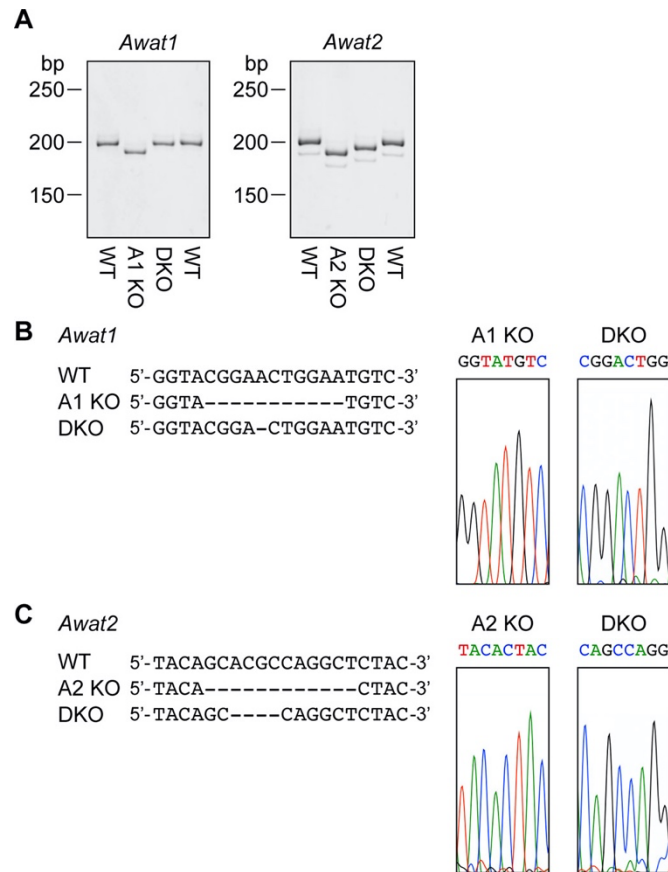

**Figure S1. Gene Disruption of *Awat1* and/or *Awat2* in KO/DKO Mice. Related to Figures 1B and 1C.**

(A) DNA fragments around the guide RNA target sequences in *Awat1* and *Awat2* were amplified by PCR using tail DNA from WT, *Awat1* KO, *Awat2* KO, and *Awat1 Awat2* DKO mice, separated by 16% polyacrylamide gel electrophoresis, and stained with ethidium bromide. bp, base pairs.

(B and C) Mutations in *Awat1* in *Awat1* KO and DKO mice (B) and *Awat2* in *Awat2* KO and DKO mice (C), determined by DNA sequencing. Sanger sequencing chromatograms of four bases each on the 5' and 3' ends of the deletion are shown.

A1 KO, *Awat1* KO; A2 KO, *Awat2* KO.

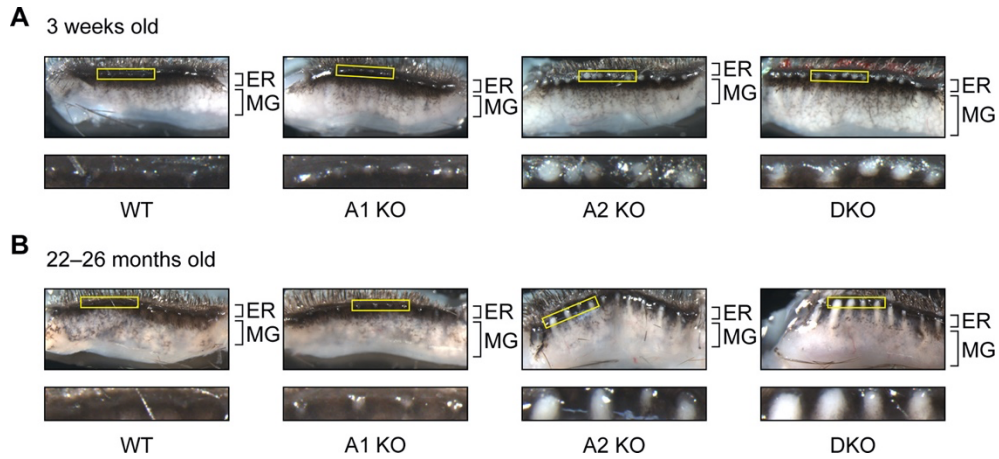

**Figure S2. Meibomian Glands and Their Orifices in Young and Old Mice. Related to Figure 2B.**

Upper eyelids from WT, *Awat1* KO, *Awat2* KO, and *Awat1 Awat2* DKO mice at 3 weeks old (A) and 22 or 26 months old (WT and *Awat1* KO mice, 22 months old; *Awat2* KO and DKO mice, 26 months old) (B), photographed under a light microscope. The lower images are magnifications of the yellow rectangles in the upper images and show the meibomian gland (MG) orifices.

A1 KO, *Awat1* KO; A2 KO, *Awat2* KO; ER, eyelid rim.

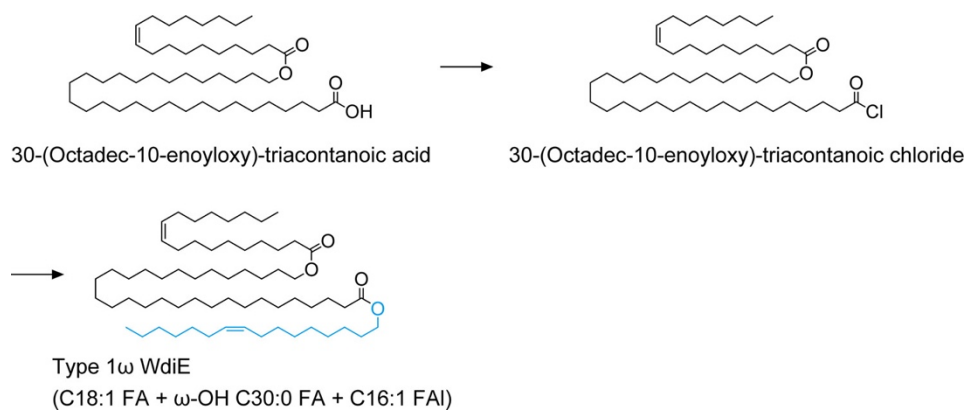

**Figure S3. Synthesis scheme for type 1 $\omega$  WdiE, (O-C18:1)- $\omega$ -OH C30:0-C16:1. Related to Figure 7.**

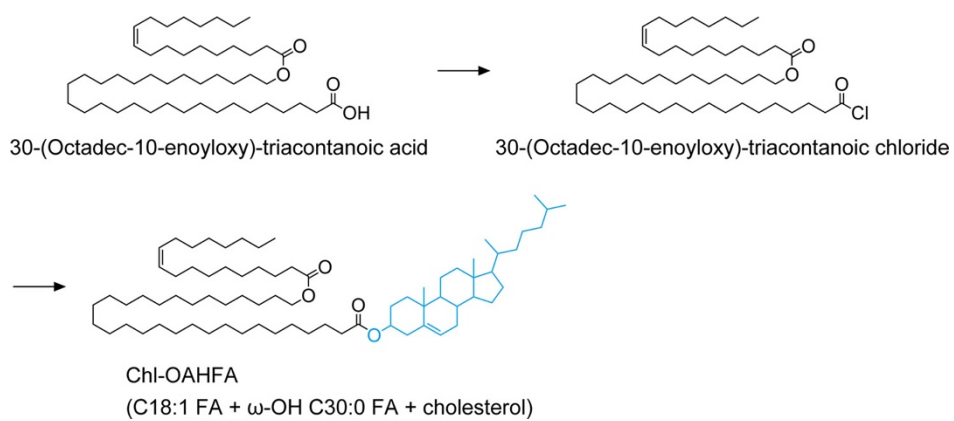

**Figure S4. Synthesis scheme for Chl-OAHFA, (O-C18:1)- $\omega$ -OH C30:0-Chl. Related to Figure 8.**

**Table S1. Quantities of all WEs measured in this study. Related to Figures 4A and 4B.**

| FA    | FAI   | WT (pmol/mg)  | A1 KO<br>(pmol/mg) | A2 KO<br>(pmol/mg) | DKO<br>(pmol/mg) |
|-------|-------|---------------|--------------------|--------------------|------------------|
| C16:1 | C16:1 | ND            | ND                 | ND                 | ND               |
| C16:1 | C17:1 | ND            | ND                 | ND                 | ND               |
| C16:1 | C18:1 | ND            | ND                 | ND                 | ND               |
| C16:1 | C19:1 | ND            | ND                 | ND                 | ND               |
| C16:1 | C20:1 | 0.09 ± 0.03   | 0.11 ± 0.06        | 0.13 ± 0.10        | 0.11 ± 0.11      |
| C16:1 | C21:1 | ND            | ND                 | ND                 | ND               |
| C16:1 | C22:1 | ND            | ND                 | ND                 | ND               |
| C16:1 | C23:1 | ND            | ND                 | ND                 | ND               |
| C16:1 | C24:1 | 0.42 ± 0.28   | 0.52 ± 0.45        | 0.13 ± 0.12        | 0.13 ± 0.10      |
| C16:1 | C25:1 | ND            | ND                 | ND                 | ND               |
| C16:1 | C26:1 | 6.67 ± 3.94   | 6.25 ± 6.36        | 0.10 ± 0.12        | 0.03 ± 0.02      |
| C16:1 | C27:1 | 0.42 ± 0.17   | 0.41 ± 0.31        | 0.00 ± 0.00        | 0.00 ± 0.00      |
| C16:1 | C28:1 | 8.37 ± 3.74   | 6.56 ± 6.08        | 0.04 ± 0.09        | 0.01 ± 0.02      |
| C16:1 | C29:1 | 0.63 ± 0.27   | 0.45 ± 0.46        | 0.00 ± 0.00        | 0.00 ± 0.00      |
| C16:1 | C30:1 | 26.71 ± 13.19 | 19.89 ± 18.23      | 0.04 ± 0.07        | 0.00 ± 0.01      |
| C16:1 | C31:1 | 1.82 ± 0.87   | 0.66 ± 0.51        | 0.00 ± 0.00        | 0.00 ± 0.00      |
| C16:1 | C32:1 | 54.18 ± 27.87 | 32.70 ± 33.74      | 0.20 ± 0.25        | 0.07 ± 0.08      |
| C16:1 | C33:1 | 2.70 ± 1.63   | 1.84 ± 2.14        | 0.00 ± 0.01        | 0.00 ± 0.00      |
| C16:1 | C34:1 | 7.63 ± 5.05   | 4.34 ± 5.58        | 0.02 ± 0.02        | 0.03 ± 0.03      |
| C16:1 | C35:1 | 0.28 ± 0.28   | 0.25 ± 0.29        | 0.03 ± 0.04        | 0.00 ± 0.00      |
| C16:1 | C36:1 | 0.08 ± 0.09   | 0.02 ± 0.04        | 0.00 ± 0.00        | 0.00 ± 0.00      |
| C16:1 | C16:0 | 0.02 ± 0.03   | 0.03 ± 0.01        | 0.07 ± 0.12        | 0.03 ± 0.04      |
| C16:1 | C17:0 | ND            | ND                 | ND                 | ND               |
| C16:1 | C18:0 | 0.07 ± 0.07   | 0.12 ± 0.10        | 0.16 ± 0.10        | 0.14 ± 0.12      |
| C16:1 | C19:0 | ND            | ND                 | ND                 | ND               |
| C16:1 | C20:0 | 0.17 ± 0.16   | 0.17 ± 0.16        | 0.25 ± 0.14        | 0.16 ± 0.07      |
| C16:1 | C21:0 | 0.18 ± 0.23   | 0.18 ± 0.19        | 0.02 ± 0.03        | 0.02 ± 0.03      |
| C16:1 | C22:0 | 1.51 ± 2.74   | 0.36 ± 0.35        | 0.18 ± 0.26        | 0.06 ± 0.06      |
| C16:1 | C23:0 | 1.42 ± 2.07   | 0.60 ± 0.55        | 0.17 ± 0.25        | 0.06 ± 0.04      |
| C16:1 | C24:0 | 24.01 ± 12.26 | 21.29 ± 14.47      | 0.46 ± 0.56        | 0.30 ± 0.18      |
| C16:1 | C25:0 | 32.58 ± 14.77 | 34.34 ± 25.50      | 0.17 ± 0.21        | 0.07 ± 0.04      |

|       |       |                 |                 |             |             |
|-------|-------|-----------------|-----------------|-------------|-------------|
| C16:1 | C26:0 | 348.86 ± 144.37 | 261.96 ± 222.25 | 1.53 ± 1.79 | 0.31 ± 0.24 |
| C16:1 | C27:0 | 146.57 ± 47.58  | 100.79 ± 70.35  | 0.43 ± 0.68 | 0.14 ± 0.11 |
| C16:1 | C28:0 | 43.95 ± 17.31   | 26.26 ± 20.48   | 0.44 ± 0.44 | 0.18 ± 0.16 |
| C16:1 | C29:0 | 19.89 ± 7.01    | 11.42 ± 7.95    | 0.10 ± 0.09 | 0.02 ± 0.02 |
| C16:1 | C30:0 | 10.73 ± 5.19    | 6.50 ± 6.44     | 0.14 ± 0.11 | 0.06 ± 0.05 |
| C16:1 | C31:0 | 6.85 ± 3.82     | 3.69 ± 3.58     | 0.04 ± 0.04 | 0.04 ± 0.04 |
| C16:1 | C32:0 | 1.77 ± 1.43     | 1.12 ± 1.29     | 0.04 ± 0.05 | 0.04 ± 0.04 |
| C16:1 | C33:0 | 0.64 ± 0.39     | 0.47 ± 0.57     | 0.00 ± 0.01 | 0.01 ± 0.01 |
| C16:1 | C34:0 | ND              | ND              | ND          | ND          |
| C16:1 | C35:0 | ND              | ND              | ND          | ND          |
| C16:1 | C36:0 | ND              | ND              | ND          | ND          |
| C16:2 | C26:0 | 0.96 ± 0.49     | 0.88 ± 0.67     | 0.10 ± 0.02 | 0.07 ± 0.04 |
| C18:2 | C26:0 | 7.15 ± 2.75     | 4.32 ± 4.09     | 0.09 ± 0.06 | 0.07 ± 0.03 |
| C16:1 | C26:0 | 330.65 ± 121.26 | 234.02 ± 212.13 | 1.70 ± 1.58 | 0.73 ± 0.47 |
| C17:1 | C26:0 | 7.75 ± 3.29     | 4.89 ± 4.23     | 0.07 ± 0.08 | 0.02 ± 0.00 |
| C18:1 | C26:0 | 149.93 ± 52.51  | 80.66 ± 64.86   | 1.89 ± 1.47 | 1.18 ± 0.80 |
| C19:1 | C26:0 | 0.45 ± 0.17     | 0.21 ± 0.17     | 0.03 ± 0.01 | 0.02 ± 0.00 |
| C20:1 | C26:0 | 0.63 ± 0.44     | 0.31 ± 0.26     | 0.06 ± 0.02 | 0.09 ± 0.06 |
| C21:1 | C26:0 | ND              | ND              | ND          | ND          |
| C22:1 | C26:0 | 0.14 ± 0.10     | 0.07 ± 0.07     | 0.05 ± 0.03 | 0.11 ± 0.08 |
| C23:1 | C26:0 | ND              | ND              | ND          | ND          |
| C24:1 | C26:0 | 0.08 ± 0.04     | 0.07 ± 0.05     | 0.18 ± 0.10 | 0.36 ± 0.20 |
| C25:1 | C26:0 | ND              | ND              | ND          | ND          |
| C26:1 | C26:0 | ND              | ND              | ND          | ND          |
| C16:0 | C26:0 | ND              | ND              | ND          | ND          |
| C17:0 | C26:0 | ND              | ND              | ND          | ND          |
| C18:0 | C26:0 | ND              | ND              | ND          | ND          |
| C19:0 | C26:0 | ND              | ND              | ND          | ND          |
| C20:0 | C26:0 | ND              | ND              | ND          | ND          |
| C21:0 | C26:0 | 0.28 ± 0.03     | 0.16 ± 0.08     | 0.10 ± 0.03 | 0.07 ± 0.04 |
| C22:0 | C26:0 | ND              | ND              | ND          | ND          |
| C23:0 | C26:0 | 0.11 ± 0.02     | 0.07 ± 0.04     | 0.07 ± 0.02 | 0.06 ± 0.02 |
| C24:0 | C26:0 | ND              | ND              | ND          | ND          |
| C25:0 | C26:0 | ND              | ND              | ND          | ND          |

C26:0

C26:0

ND

ND

ND

ND

---

Values represent the means  $\pm$  standard deviations (n = 5). ND, not detected.



**Table S2. Quantities of all OAHFAs measured in this study. Related to Figures 5A and 5B.**

| FA    | $\omega$ -OH<br>FA | WT ( $\times 10^5$ peak<br>area/mg) | A1 KO ( $\times 10^5$<br>peak area/mg) | A2 KO ( $\times 10^5$<br>peak area/mg) | DKO ( $\times 10^5$ peak<br>area/mg) |
|-------|--------------------|-------------------------------------|----------------------------------------|----------------------------------------|--------------------------------------|
| C16:1 | C16:1              | ND                                  | ND                                     | ND                                     | ND                                   |
| C16:1 | C17:1              | ND                                  | ND                                     | ND                                     | ND                                   |
| C16:1 | C18:1              | ND                                  | ND                                     | ND                                     | ND                                   |
| C16:1 | C19:1              | ND                                  | ND                                     | ND                                     | ND                                   |
| C16:1 | C20:1              | ND                                  | ND                                     | ND                                     | ND                                   |
| C16:1 | C21:1              | ND                                  | ND                                     | ND                                     | ND                                   |
| C16:1 | C22:1              | ND                                  | ND                                     | ND                                     | ND                                   |
| C16:1 | C23:1              | ND                                  | ND                                     | ND                                     | ND                                   |
| C16:1 | C24:1              | 0.14 $\pm$ 0.05                     | 0.40 $\pm$ 0.12                        | 0.01 $\pm$ 0.01                        | 0.00 $\pm$ 0.00                      |
| C16:1 | C25:1              | ND                                  | ND                                     | ND                                     | ND                                   |
| C16:1 | C26:1              | 0.12 $\pm$ 0.02                     | 0.17 $\pm$ 0.12                        | 0.05 $\pm$ 0.04                        | 0.05 $\pm$ 0.05                      |
| C16:1 | C27:1              | ND                                  | ND                                     | ND                                     | ND                                   |
| C16:1 | C28:1              | ND                                  | ND                                     | ND                                     | ND                                   |
| C16:1 | C29:1              | ND                                  | ND                                     | ND                                     | ND                                   |
| C16:1 | C30:1              | 0.67 $\pm$ 0.21                     | 0.12 $\pm$ 0.10                        | 0.44 $\pm$ 0.14                        | 0.13 $\pm$ 0.11                      |
| C16:1 | C31:1              | 0.39 $\pm$ 0.29                     | 0.04 $\pm$ 0.04                        | 0.08 $\pm$ 0.10                        | 0.07 $\pm$ 0.02                      |
| C16:1 | C32:1              | 13.62 $\pm$ 2.20                    | 2.03 $\pm$ 0.39                        | 9.96 $\pm$ 2.08                        | 2.03 $\pm$ 0.57                      |
| C16:1 | C33:1              | 7.70 $\pm$ 0.67                     | 2.24 $\pm$ 0.62                        | 3.32 $\pm$ 0.84                        | 0.69 $\pm$ 0.18                      |
| C16:1 | C34:1              | 24.24 $\pm$ 2.38                    | 4.96 $\pm$ 1.23                        | 19.23 $\pm$ 4.75                       | 5.76 $\pm$ 2.27                      |
| C16:1 | C35:1              | 14.66 $\pm$ 1.40                    | 7.32 $\pm$ 1.90                        | 4.09 $\pm$ 0.80                        | 1.19 $\pm$ 0.26                      |
| C16:1 | C36:1              | 4.04 $\pm$ 0.23                     | 0.02 $\pm$ 0.04                        | 0.00 $\pm$ 0.00                        | 0.00 $\pm$ 0.00                      |
| C16:1 | C16:0              | ND                                  | ND                                     | ND                                     | ND                                   |
| C16:1 | C17:0              | ND                                  | ND                                     | ND                                     | ND                                   |
| C16:1 | C18:0              | ND                                  | ND                                     | ND                                     | ND                                   |
| C16:1 | C19:0              | ND                                  | ND                                     | ND                                     | ND                                   |
| C16:1 | C20:0              | ND                                  | ND                                     | ND                                     | ND                                   |
| C16:1 | C21:0              | ND                                  | ND                                     | ND                                     | ND                                   |
| C16:1 | C22:0              | 0.10 $\pm$ 0.04                     | 0.21 $\pm$ 0.12                        | 0.03 $\pm$ 0.02                        | 0.01 $\pm$ 0.01                      |
| C16:1 | C23:0              | 0.18 $\pm$ 0.06                     | 0.25 $\pm$ 0.12                        | 0.03 $\pm$ 0.06                        | 0.01 $\pm$ 0.02                      |
| C16:1 | C24:0              | 0.36 $\pm$ 0.13                     | 0.55 $\pm$ 0.12                        | 0.18 $\pm$ 0.05                        | 0.21 $\pm$ 0.07                      |
| C16:1 | C25:0              | ND                                  | ND                                     | ND                                     | ND                                   |

|       |       |              |             |               |              |
|-------|-------|--------------|-------------|---------------|--------------|
| C16:1 | C26:0 | 0.27 ± 0.14  | 0.25 ± 0.07 | 0.44 ± 0.11   | 0.78 ± 0.28  |
| C16:1 | C27:0 | 0.20 ± 0.04  | 0.07 ± 0.06 | 0.02 ± 0.01   | 0.02 ± 0.01  |
| C16:1 | C28:0 | 0.01 ± 0.01  | 0.01 ± 0.01 | 0.08 ± 0.10   | 0.20 ± 0.18  |
| C16:1 | C29:0 | ND           | ND          | ND            | ND           |
| C16:1 | C30:0 | 0.32 ± 0.05  | 0.16 ± 0.07 | 0.23 ± 0.09   | 0.34 ± 0.16  |
| C16:1 | C31:0 | 0.39 ± 0.07  | 0.02 ± 0.02 | 0.09 ± 0.07   | 0.09 ± 0.05  |
| C16:1 | C32:0 | 0.39 ± 0.12  | 0.14 ± 0.11 | 0.33 ± 0.15   | 0.34 ± 0.19  |
| C16:1 | C33:0 | 1.35 ± 0.26  | 0.34 ± 0.18 | 0.26 ± 0.05   | 0.17 ± 0.08  |
| C16:1 | C34:0 | ND           | ND          | ND            | ND           |
| C16:1 | C35:0 | 0.21 ± 0.07  | 0.09 ± 0.07 | 0.00 ± 0.00   | 0.02 ± 0.02  |
| C16:1 | C36:0 | ND           | ND          | ND            | ND           |
| C16:2 | C34:1 | 0.59 ± 0.36  | 0.03 ± 0.04 | 0.46 ± 0.32   | 0.03 ± 0.04  |
| C18:2 | C34:1 | 6.72 ± 3.60  | 3.93 ± 1.20 | 35.41 ± 16.75 | 35.63 ± 6.10 |
| C16:1 | C34:1 | 18.88 ± 5.78 | 2.95 ± 1.32 | 20.58 ± 9.28  | 7.02 ± 2.10  |
| C17:1 | C34:1 | 0.91 ± 0.79  | 0.10 ± 0.07 | 1.27 ± 0.88   | 0.37 ± 0.20  |
| C18:1 | C34:1 | 11.16 ± 2.87 | 2.67 ± 0.38 | 47.81 ± 20.55 | 26.12 ± 6.67 |
| C19:1 | C34:1 | ND           | ND          | ND            | ND           |
| C20:1 | C34:1 | 0.08 ± 0.05  | 0.03 ± 0.02 | 1.27 ± 0.91   | 0.91 ± 0.40  |
| C21:1 | C34:1 | ND           | ND          | ND            | ND           |
| C22:1 | C34:1 | 0.09 ± 0.03  | 0.01 ± 0.01 | 0.67 ± 0.32   | 0.33 ± 0.23  |
| C23:1 | C34:1 | ND           | ND          | ND            | ND           |
| C24:1 | C34:1 | ND           | ND          | ND            | ND           |
| C25:1 | C34:1 | ND           | ND          | ND            | ND           |
| C26:1 | C34:1 | 0.03 ± 0.02  | 0.01 ± 0.01 | 0.35 ± 0.35   | 0.08 ± 0.11  |
| C27:1 | C34:1 | ND           | ND          | ND            | ND           |
| C28:1 | C34:1 | ND           | ND          | ND            | ND           |
| C29:1 | C34:1 | ND           | ND          | ND            | ND           |
| C30:1 | C34:1 | ND           | ND          | ND            | ND           |
| C31:1 | C34:1 | ND           | ND          | ND            | ND           |
| C32:1 | C34:1 | ND           | ND          | ND            | ND           |
| C33:1 | C34:1 | ND           | ND          | ND            | ND           |
| C34:1 | C34:1 | ND           | ND          | ND            | ND           |
| C35:1 | C34:1 | ND           | ND          | ND            | ND           |
| C36:1 | C34:1 | ND           | ND          | ND            | ND           |
| C16:0 | C34:1 | 2.17 ± 0.96  | 0.81 ± 0.47 | 11.95 ± 5.07  | 5.14 ± 1.27  |

|       |       |             |             |             |             |
|-------|-------|-------------|-------------|-------------|-------------|
| C17:0 | C34:1 | 1.22 ± 0.36 | 0.08 ± 0.07 | 0.64 ± 0.14 | 0.36 ± 0.09 |
| C18:0 | C34:1 | 0.10 ± 0.11 | 0.15 ± 0.05 | 5.89 ± 3.04 | 2.15 ± 1.29 |
| C19:0 | C34:1 | 0.02 ± 0.01 | ND          | 0.29 ± 0.27 | 0.08 ± 0.03 |
| C20:0 | C34:1 | 0.01 ± 0.01 | 0.01 ± 0.00 | 0.34 ± 0.21 | 0.08 ± 0.06 |
| C21:0 | C34:1 | ND          | ND          | ND          | ND          |
| C22:0 | C34:1 | ND          | ND          | ND          | ND          |
| C23:0 | C34:1 | ND          | ND          | ND          | ND          |
| C24:0 | C34:1 | ND          | ND          | ND          | ND          |
| C25:0 | C34:1 | ND          | ND          | ND          | ND          |
| C26:0 | C34:1 | ND          | ND          | ND          | ND          |
| C27:0 | C34:1 | ND          | ND          | ND          | ND          |
| C28:0 | C34:1 | ND          | ND          | ND          | ND          |
| C29:0 | C34:1 | ND          | ND          | ND          | ND          |
| C30:0 | C34:1 | ND          | ND          | ND          | ND          |
| C31:0 | C34:1 | ND          | ND          | ND          | ND          |
| C32:0 | C34:1 | ND          | ND          | ND          | ND          |
| C33:0 | C34:1 | ND          | ND          | ND          | ND          |
| C34:0 | C34:1 | ND          | ND          | ND          | ND          |
| C35:0 | C34:1 | ND          | ND          | ND          | ND          |
| C36:0 | C34:1 | ND          | ND          | ND          | ND          |

---

Values represent the means ± standard deviations (n = 4). ND, not detected.

**Table S7. Quantities of all Chi-OAHFAs measured in this study. Related to Figure 8B.**

| OAHFA | WT ( $\times 10^5$ peak area/mg) | A1 KO ( $\times 10^5$ peak area/mg) | A2 KO ( $\times 10^5$ peak area/mg) | DKO ( $\times 10^5$ peak area/mg) |
|-------|----------------------------------|-------------------------------------|-------------------------------------|-----------------------------------|
| C32:3 | ND                               | ND                                  | ND                                  | ND                                |
| C33:3 | ND                               | ND                                  | ND                                  | ND                                |
| C34:3 | ND                               | ND                                  | ND                                  | ND                                |
| C35:3 | ND                               | ND                                  | ND                                  | ND                                |
| C36:3 | ND                               | ND                                  | ND                                  | ND                                |
| C37:3 | ND                               | ND                                  | ND                                  | ND                                |
| C38:3 | ND                               | ND                                  | ND                                  | ND                                |
| C39:3 | ND                               | ND                                  | ND                                  | ND                                |
| C40:3 | ND                               | ND                                  | ND                                  | ND                                |
| C41:3 | ND                               | ND                                  | ND                                  | ND                                |
| C42:3 | ND                               | ND                                  | ND                                  | ND                                |
| C43:3 | ND                               | ND                                  | ND                                  | ND                                |
| C44:3 | ND                               | ND                                  | ND                                  | ND                                |
| C45:3 | ND                               | ND                                  | ND                                  | ND                                |
| C46:3 | ND                               | ND                                  | ND                                  | ND                                |
| C47:3 | ND                               | ND                                  | ND                                  | ND                                |
| C48:3 | 0.92 $\pm$ 0.33                  | 0.10 $\pm$ 0.12                     | 0.04 $\pm$ 0.06                     | 0.05 $\pm$ 0.07                   |
| C49:3 | 0.25 $\pm$ 0.07                  | 0.07 $\pm$ 0.06                     | 0.02 $\pm$ 0.01                     | 0.02 $\pm$ 0.02                   |
| C50:3 | 2.10 $\pm$ 0.55                  | 1.01 $\pm$ 0.11                     | 0.65 $\pm$ 0.47                     | 0.33 $\pm$ 0.38                   |
| C51:3 | 0.22 $\pm$ 0.08                  | 0.12 $\pm$ 0.04                     | 0.03 $\pm$ 0.03                     | 0.04 $\pm$ 0.01                   |
| C52:3 | 1.43 $\pm$ 0.29                  | 0.92 $\pm$ 0.13                     | 0.75 $\pm$ 0.30                     | 0.51 $\pm$ 0.13                   |
| C53:3 | ND                               | ND                                  | ND                                  | ND                                |
| C54:3 | 0.54 $\pm$ 0.14                  | 0.33 $\pm$ 0.22                     | 0.48 $\pm$ 0.15                     | 0.39 $\pm$ 0.06                   |
| C32:2 | ND                               | ND                                  | ND                                  | ND                                |
| C33:2 | 0.00 $\pm$ 0.00                  | 0.00 $\pm$ 0.00                     | 0.05 $\pm$ 0.05                     | 0.26 $\pm$ 0.08                   |
| C34:2 | ND                               | ND                                  | ND                                  | ND                                |
| C35:2 | 0.00 $\pm$ 0.00                  | 0.00 $\pm$ 0.00                     | 0.08 $\pm$ 0.09                     | 0.24 $\pm$ 0.16                   |
| C36:2 | ND                               | ND                                  | ND                                  | ND                                |
| C37:2 | 0.00 $\pm$ 0.00                  | 0.00 $\pm$ 0.00                     | 0.08 $\pm$ 0.07                     | 0.17 $\pm$ 0.06                   |
| C38:2 | ND                               | ND                                  | ND                                  | ND                                |
| C39:2 | ND                               | ND                                  | ND                                  | ND                                |

|       |              |             |             |             |
|-------|--------------|-------------|-------------|-------------|
| C40:2 | ND           | ND          | ND          | ND          |
| C41:2 | ND           | ND          | ND          | ND          |
| C42:2 | ND           | ND          | ND          | ND          |
| C43:2 | ND           | ND          | ND          | ND          |
| C44:2 | ND           | ND          | ND          | ND          |
| C45:2 | ND           | ND          | ND          | ND          |
| C46:2 | 0.54 ± 0.19  | 0.25 ± 0.09 | 0.14 ± 0.17 | 0.43 ± 0.19 |
| C47:2 | 0.35 ± 0.19  | 0.04 ± 0.05 | 0.02 ± 0.01 | 0.04 ± 0.04 |
| C48:2 | 5.54 ± 1.59  | 2.69 ± 0.26 | 1.85 ± 0.57 | 2.61 ± 0.22 |
| C49:2 | 1.21 ± 0.40  | 0.59 ± 0.24 | 0.22 ± 0.04 | 0.60 ± 0.13 |
| C50:2 | 10.53 ± 2.70 | 8.05 ± 0.41 | 5.45 ± 1.26 | 7.35 ± 1.21 |
| C51:2 | 0.95 ± 0.33  | 0.84 ± 0.25 | 0.49 ± 0.16 | 0.83 ± 0.10 |
| C52:2 | 6.13 ± 1.34  | 5.24 ± 1.53 | 3.54 ± 0.95 | 5.23 ± 0.83 |
| C53:2 | 0.35 ± 0.13  | 0.29 ± 0.05 | 0.13 ± 0.04 | 0.29 ± 0.13 |
| C54:2 | 3.24 ± 1.14  | 1.89 ± 0.88 | 1.98 ± 0.52 | 4.17 ± 0.44 |

---

Values represent the means ± standard deviations (n = 4). ND, not detected.

**Table S8. Quantities of all CEs measured in this study. Related to Figure 8C.**

| FA    | WT (pmol/mg)    | A1 KO (pmol/mg) | A2 KO (pmol/mg) | DKO (pmol/mg)   |
|-------|-----------------|-----------------|-----------------|-----------------|
| C16:1 | 22.18 ± 32.88   | 22.27 ± 34.49   | 4.07 ± 5.69     | 1.14 ± 2.54     |
| C17:1 | 0.85 ± 1.91     | 1.12 ± 2.50     | 0.89 ± 1.98     | 0.46 ± 1.02     |
| C18:1 | 23.31± 17.68    | 16.51 ± 21.67   | ND              | 2.17 ± 3.02     |
| C19:1 | ND              | 0.64 ± 1.43     | ND              | ND              |
| C20:1 | 21.52± 15.05    | 8.07 ± 11.41    | ND              | 1.74 ± 3.88     |
| C21:1 | 3.71 ± 5.14     | 0.80 ± 1.79     | 0.64 ± 1.44     | ND              |
| C22:1 | 65.41± 22.55    | 55.12 ± 75.31   | 13.77 ± 13.99   | 6.63 ± 9.76     |
| C23:1 | ND              | ND              | ND              | ND              |
| C24:1 | 69.01± 24.86    | 67.33 ± 91.29   | 35.93 ± 21.57   | 40.41 ± 22.28   |
| C25:1 | ND              | ND              | 1.65 ± 2.60     | 0.81 ± 1.81     |
| C26:1 | 29.48± 20.23    | 25.45 ± 42.12   | 19.55 ± 17.15   | 47.85 ± 48.83   |
| C27:1 | ND              | 0.70 ± 1.58     | 0.91 ± 2.03     | 4.82 ± 8.58     |
| C28:1 | 26.04 ± 27.98   | 27.26 ± 41.00   | 43.61 ± 22.48   | 49.36 ± 39.70   |
| C29:1 | 1.21 ± 2.70     | ND              | 0.82 ± 1.83     | 1.91 ± 2.75     |
| C30:1 | 45.56 ± 40.67   | 24.33 ± 29.95   | 41.08 ± 16.82   | 87.86 ± 76.86   |
| C31:1 | ND              | 0.44 ± 0.99     | 1.90 ± 4.26     | 5.46 ± 10.35    |
| C32:1 | 34.94 ± 50.99   | 19.74 ± 31.57   | 37.32 ± 28.30   | 78.49 ± 51.68   |
| C33:1 | 6.24 ± 10.20    | 2.26 ± 3.37     | 3.01 ± 4.66     | 7.14 ± 7.11     |
| C34:1 | 12.23 ± 15.49   | 0.82 ± 1.84     | 10.89 ± 7.55    | 15.45 ± 15.14   |
| C35:1 | 0.69 ± 1.54     | 0.70 ± 1.57     | 0.89 ± 1.22     | 2.20 ± 2.26     |
| C36:1 | ND              | 0.92 ± 2.05     | ND              | ND              |
| C16:0 | 127.67 ± 40.32  | 56.93 ± 72.17   | 75.48 ± 32.08   | 39.48 ± 32.54   |
| C17:0 | 97.57 ± 23.59   | 48.53 ± 34.68   | 29.48 ± 27.62   | 21.80 ± 8.49    |
| C18:0 | 60.36 ± 35.87   | 19.06 ± 38.81   | 12.69 ± 6.62    | 36.12 ± 24.53   |
| C19:0 | 106.41 ± 20.52  | 54.38 ± 46.04   | 50.73 ± 22.57   | 36.13 ± 35.33   |
| C20:0 | 456.30 ± 178.01 | 234.26 ± 152.02 | 296.93 ± 119.79 | 250.95 ± 89.87  |
| C21:0 | 400.19 ± 234.69 | 213.39 ± 131.97 | 264.36 ± 147.67 | 209.08 ± 72.41  |
| C22:0 | 291.23 ± 258.19 | 141.82 ± 112.36 | 170.76 ± 112.92 | 114.98 ± 69.25  |
| C23:0 | 208.05 ± 122.08 | 102.86 ± 109.70 | 140.15 ± 87.56  | 93.53 ± 27.23   |
| C24:0 | 309.64 ± 176.15 | 166.68 ± 176.88 | 194.46 ± 62.38  | 171.31 ± 82.26  |
| C25:0 | 465.79 ± 230.73 | 344.12 ± 375.26 | 274.93 ± 88.59  | 262.12 ± 117.22 |
| C26:0 | 447.40 ± 290.43 | 262.46 ± 219.09 | 285.13 ± 102.06 | 294.55 ± 124.56 |

|       |                 |                 |                |                |
|-------|-----------------|-----------------|----------------|----------------|
| C27:0 | 252.27 ± 138.95 | 165.83 ± 153.67 | 163.98 ± 61.53 | 162.95 ± 86.84 |
| C28:0 | 47.96 ± 52.54   | 30.56 ± 39.70   | 34.95 ± 41.68  | 39.81 ± 27.95  |
| C29:0 | 42.21 ± 38.81   | 25.34 ± 26.43   | 20.34 ± 11.32  | 23.04 ± 27.12  |
| C30:0 | 4.61 ± 6.56     | 4.58 ± 10.25    | 6.49 ± 8.24    | 1.82 ± 3.51    |
| C31:0 | 5.36 ± 5.21     | 3.11 ± 5.49     | 3.74 ± 3.83    | 3.56 ± 3.47    |
| C32:0 | 1.26 ± 2.09     | ND              | 0.55 ± 1.22    | ND             |
| C33:0 | ND              | ND              | 0.42 ± 0.93    | ND             |
| C34:0 | ND              | ND              | ND             | ND             |
| C35:0 | ND              | 0.48 ± 1.08     | 1.68 ± 2.31    | 2.40 ± 5.36    |
| C36:0 | ND              | ND              | ND             | 0.27 ± 0.60    |

---

Values represent the means ± standard deviations (n = 5). ND, not detected.

**Table S9. List of oligonucleotides used. Related to Figures 1B–E.**

| Oligonucleotide name | Sequence                               |
|----------------------|----------------------------------------|
| Awat1-F1             | 5'-CACCGGTTTCAGACTGGGTACGGAAC-3'       |
| Awat1-R1             | 5'-AAACGTTCCGTACCCAGTCTGAACC-3'        |
| Awat1-F2             | 5'-GGGTGAATAAGAGACCTGGGGTGG-3'         |
| Awat1-R2             | 5'-TCCCTAGTCATTTGATATAATGTCTGC-3'      |
| Awat1-F3             | 5'-GGGATCCAAACGCTAGACAGCTGAAACCATTC-3' |
| Awat1-R3             | 5'-CACATTGTAGCTACTTCTCTGAAGC-3'        |
| Awat1-F4             | 5'-GGAGAAACAGAGGTATATGACCAGG-3'        |
| Awat1-R4             | 5'-TCACAAGAATATCAGCTTCTGGGTGTTGG-3'    |
| Awat2-F1             | 5'-CACCGGAGTGCAGATACAGCACGCC-3'        |
| Awat2-R1             | 5'-AAACGGCGTGCTGTATCTGCACTCC-3'        |
| Awat2-F2             | 5'-GGCTTTTTCTGCACACTAGGGTCGTG-3'       |
| Awat2-R2             | 5'-CCTTACCCATGTTTAAGGGCTGTGC-3'        |
| Awat2-F3             | 5'-GGGATCCCAAGATTGTCTCAGGTGCTAACCGC-3' |
| Awat2-R3             | 5'-AGTAAATACACACACACATGCATGC-3'        |
| Awat2-F4             | 5'-GGAGAGACAGACCTCTATGACCAGC-3'        |
| Awat2-R4             | 5'-TCAAACACTATCACCAGCTCCTGGGTC-3'      |
| Far1-F               | 5'-GATAATGTCAATATGTTAATGAACC-3'        |
| Far1-R               | 5'-TCAGTATCTCATAGTGCTGGATGCTCG-3'      |
| Far2-F               | 5'-TCCATGCTGGAGTATTTTCATCAACC-3'       |
| Far2-R               | 5'-TTGAACAAGGGACAAATGAAGAACC-3'        |
| Soat1-F              | 5'-GCCGTCTTCGCCCTGTCGGCTGTGG-3'        |
| Soat1-R              | 5'-CTAAAACACGTACCGACAAGTCCAGG -3'      |
| Cyp4f39-F            | 5'-AGCATCTACGGGACCCACCACAACC-3'        |
| Cyp4f39-R            | 5'-TGAGGGTAGAGGCTCTACATTGAGC-3'        |
| Hprt-F               | 5'-GCTGACCTGCTGGATTACATTAAG-3'         |
| Hprt-R               | 5'-CTTAACCATTTTGGGGCTGTAAGC-3'         |



**Table S10. Selected *m/z* values for WEs in MS/MS analysis. Related to Figures 4A and 4B.**

| FA    | FAI   | Precursor ion (Q1)   | Product ion (Q3)       |
|-------|-------|----------------------|------------------------|
|       |       | [M + H] <sup>+</sup> | [FA - OH] <sup>+</sup> |
| C16:1 | C16:1 | 477.5                | 237.1                  |
| C16:1 | C17:1 | 491.5                | 237.1                  |
| C16:1 | C18:1 | 505.5                | 237.1                  |
| C16:1 | C19:1 | 519.5                | 237.1                  |
| C16:1 | C20:1 | 533.5                | 237.1                  |
| C16:1 | C21:1 | 547.5                | 237.1                  |
| C16:1 | C22:1 | 561.6                | 237.1                  |
| C16:1 | C23:1 | 575.6                | 237.1                  |
| C16:1 | C24:1 | 589.6                | 237.1                  |
| C16:1 | C25:1 | 603.6                | 237.1                  |
| C16:1 | C26:1 | 617.6                | 237.1                  |
| C16:1 | C27:1 | 631.6                | 237.1                  |
| C16:1 | C28:1 | 645.6                | 237.1                  |
| C16:1 | C29:1 | 659.7                | 237.1                  |
| C16:1 | C30:1 | 673.7                | 237.1                  |
| C16:1 | C31:1 | 687.7                | 237.1                  |
| C16:1 | C32:1 | 701.7                | 237.1                  |
| C16:1 | C33:1 | 715.7                | 237.1                  |
| C16:1 | C34:1 | 729.7                | 237.1                  |
| C16:1 | C35:1 | 743.8                | 237.1                  |
| C16:1 | C36:1 | 757.8                | 237.1                  |
| C16:1 | C16:0 | 479.5                | 237.1                  |
| C16:1 | C17:0 | 493.5                | 237.1                  |
| C16:1 | C18:0 | 507.5                | 237.1                  |
| C16:1 | C19:0 | 521.5                | 237.1                  |
| C16:1 | C20:0 | 535.5                | 237.1                  |
| C16:1 | C21:0 | 549.6                | 237.1                  |
| C16:1 | C22:0 | 563.6                | 237.1                  |
| C16:1 | C23:0 | 577.6                | 237.1                  |
| C16:1 | C24:0 | 591.6                | 237.1                  |
| C16:1 | C25:0 | 605.6                | 237.1                  |

|       |       |       |       |
|-------|-------|-------|-------|
| C16:1 | C26:0 | 619.6 | 237.1 |
| C16:1 | C27:0 | 633.6 | 237.1 |
| C16:1 | C28:0 | 647.7 | 237.1 |
| C16:1 | C29:0 | 661.7 | 237.1 |
| C16:1 | C30:0 | 675.7 | 237.1 |
| C16:1 | C31:0 | 689.7 | 237.1 |
| C16:1 | C32:0 | 703.7 | 237.1 |
| C16:1 | C33:0 | 717.7 | 237.1 |
| C16:1 | C34:0 | 731.8 | 237.1 |
| C16:1 | C35:0 | 745.8 | 237.1 |
| C16:1 | C36:0 | 759.8 | 237.1 |
| C16:2 | C26:0 | 617.6 | 235.1 |
| C18:2 | C26:0 | 645.6 | 263.1 |
| C17:1 | C26:0 | 633.6 | 251.1 |
| C18:1 | C26:0 | 647.7 | 265.1 |
| C19:1 | C26:0 | 661.7 | 279.1 |
| C20:1 | C26:0 | 675.7 | 293.1 |
| C21:1 | C26:0 | 689.7 | 307.1 |
| C22:1 | C26:0 | 703.7 | 321.2 |
| C23:1 | C26:0 | 717.7 | 335.2 |
| C24:1 | C26:0 | 731.8 | 349.2 |
| C25:1 | C26:0 | 745.8 | 363.2 |
| C26:1 | C26:0 | 759.8 | 377.2 |
| C16:0 | C26:0 | 621.6 | 239.1 |
| C17:0 | C26:0 | 635.7 | 253.1 |
| C18:0 | C26:0 | 649.7 | 267.1 |
| C19:0 | C26:0 | 663.7 | 281.1 |
| C20:0 | C26:0 | 677.7 | 295.1 |
| C21:0 | C26:0 | 691.7 | 309.2 |
| C22:0 | C26:0 | 705.7 | 323.2 |
| C23:0 | C26:0 | 719.8 | 337.2 |
| C24:0 | C26:0 | 733.8 | 351.2 |
| C25:0 | C26:0 | 747.8 | 365.2 |
| C26:0 | C26:0 | 761.8 | 379.2 |

---

**Table S11. Selected *m/z* values for OAHFAs in MS/MS analysis. Related to Figures 5A and 5B.**

| FA    | $\omega$ -OH FA | Precursor ion (Q1)      | Product ion (Q3)                    |
|-------|-----------------|-------------------------|-------------------------------------|
|       |                 | [M + AMPP] <sup>+</sup> | [M + AMPP - (FA - OH)] <sup>+</sup> |
| C16:1 | C16:1           | 673.5                   | 419.0                               |
| C16:1 | C17:1           | 687.5                   | 433.0                               |
| C16:1 | C18:1           | 701.5                   | 447.0                               |
| C16:1 | C19:1           | 715.5                   | 461.0                               |
| C16:1 | C20:1           | 729.5                   | 475.1                               |
| C16:1 | C21:1           | 743.5                   | 489.1                               |
| C16:1 | C22:1           | 757.6                   | 503.1                               |
| C16:1 | C23:1           | 771.6                   | 517.1                               |
| C16:1 | C24:1           | 785.6                   | 531.1                               |
| C16:1 | C25:1           | 799.6                   | 545.1                               |
| C16:1 | C26:1           | 813.6                   | 559.1                               |
| C16:1 | C27:1           | 827.6                   | 573.2                               |
| C16:1 | C28:1           | 841.6                   | 587.2                               |
| C16:1 | C29:1           | 855.7                   | 601.2                               |
| C16:1 | C30:1           | 869.7                   | 615.2                               |
| C16:1 | C31:1           | 883.7                   | 629.2                               |
| C16:1 | C32:1           | 897.7                   | 643.2                               |
| C16:1 | C33:1           | 911.7                   | 657.3                               |
| C16:1 | C34:1           | 925.7                   | 671.3                               |
| C16:1 | C35:1           | 939.8                   | 685.3                               |
| C16:1 | C36:1           | 953.8                   | 699.3                               |
| C16:1 | C16:0           | 675.5                   | 421.0                               |
| C16:1 | C17:0           | 689.5                   | 435.0                               |
| C16:1 | C18:0           | 703.5                   | 449.0                               |
| C16:1 | C19:0           | 717.5                   | 463.1                               |
| C16:1 | C20:0           | 731.5                   | 477.1                               |
| C16:1 | C21:0           | 745.6                   | 491.1                               |
| C16:1 | C22:0           | 759.6                   | 505.1                               |
| C16:1 | C23:0           | 773.6                   | 519.1                               |
| C16:1 | C24:0           | 787.6                   | 533.1                               |
| C16:1 | C25:0           | 801.6                   | 547.1                               |

|       |       |        |       |
|-------|-------|--------|-------|
| C16:1 | C26:0 | 815.6  | 561.2 |
| C16:1 | C27:0 | 829.6  | 575.2 |
| C16:1 | C28:0 | 843.7  | 589.2 |
| C16:1 | C29:0 | 857.7  | 603.2 |
| C16:1 | C30:0 | 871.7  | 617.2 |
| C16:1 | C31:0 | 885.7  | 631.2 |
| C16:1 | C32:0 | 899.7  | 645.3 |
| C16:1 | C33:0 | 913.7  | 659.3 |
| C16:1 | C34:0 | 927.8  | 673.3 |
| C16:1 | C35:0 | 941.8  | 687.3 |
| C16:1 | C36:0 | 955.8  | 701.3 |
| C16:2 | C34:1 | 923.7  | 671.3 |
| C18:2 | C34:1 | 951.7  | 671.3 |
| C17:1 | C34:1 | 939.7  | 671.3 |
| C18:1 | C34:1 | 953.7  | 671.3 |
| C19:1 | C34:1 | 967.7  | 671.3 |
| C20:1 | C34:1 | 981.8  | 671.3 |
| C21:1 | C34:1 | 995.8  | 671.3 |
| C22:1 | C34:1 | 1009.8 | 671.3 |
| C23:1 | C34:1 | 1023.8 | 671.3 |
| C24:1 | C34:1 | 1037.8 | 671.3 |
| C25:1 | C34:1 | 1051.8 | 671.3 |
| C26:1 | C34:1 | 1065.9 | 671.3 |
| C27:1 | C34:1 | 1079.9 | 671.3 |
| C28:1 | C34:1 | 1093.9 | 671.3 |
| C29:1 | C34:1 | 1107.9 | 671.3 |
| C30:1 | C34:1 | 1121.9 | 671.3 |
| C31:1 | C34:1 | 1135.9 | 671.3 |
| C32:1 | C34:1 | 1150.0 | 671.3 |
| C33:1 | C34:1 | 1164.0 | 671.3 |
| C34:1 | C34:1 | 1178.0 | 671.3 |
| C35:1 | C34:1 | 1192.0 | 671.3 |
| C36:1 | C34:1 | 1206.0 | 671.3 |
| C16:0 | C34:1 | 927.7  | 671.3 |
| C17:0 | C34:1 | 941.7  | 671.3 |

|       |       |        |       |
|-------|-------|--------|-------|
| C18:0 | C34:1 | 955.7  | 671.3 |
| C19:0 | C34:1 | 969.8  | 671.3 |
| C20:0 | C34:1 | 983.8  | 671.3 |
| C21:0 | C34:1 | 997.8  | 671.3 |
| C22:0 | C34:1 | 1011.8 | 671.3 |
| C23:0 | C34:1 | 1025.8 | 671.3 |
| C24:0 | C34:1 | 1039.8 | 671.3 |
| C25:0 | C34:1 | 1053.9 | 671.3 |
| C26:0 | C34:1 | 1067.9 | 671.3 |
| C27:0 | C34:1 | 1081.9 | 671.3 |
| C28:0 | C34:1 | 1095.9 | 671.3 |
| C29:0 | C34:1 | 1109.9 | 671.3 |
| C30:0 | C34:1 | 1123.9 | 671.3 |
| C31:0 | C34:1 | 1138.0 | 671.3 |
| C32:0 | C34:1 | 1152.0 | 671.3 |
| C33:0 | C34:1 | 1166.0 | 671.3 |
| C34:0 | C34:1 | 1180.0 | 671.3 |
| C35:0 | C34:1 | 1194.0 | 671.3 |
| C36:0 | C34:1 | 1208.0 | 671.3 |

---

**Table S14. Selected *m/z* values for Chl-OAHFAs in MS/MS analysis. Related to Figure 8B.**

| OAHFA | Precursor ion (Q1)<br>[M + H] <sup>+</sup> | Product ion (Q3)<br>[Chl – H <sub>2</sub> O] <sup>+</sup> |
|-------|--------------------------------------------|-----------------------------------------------------------|
| C32:3 | 873.8                                      | 369.4                                                     |
| C33:3 | 887.8                                      | 369.4                                                     |
| C34:3 | 901.9                                      | 369.4                                                     |
| C35:3 | 915.9                                      | 369.4                                                     |
| C36:3 | 929.9                                      | 369.4                                                     |
| C37:3 | 943.9                                      | 369.4                                                     |
| C38:3 | 957.9                                      | 369.4                                                     |
| C39:3 | 971.9                                      | 369.4                                                     |
| C40:3 | 986.0                                      | 369.4                                                     |
| C41:3 | 1000.0                                     | 369.4                                                     |
| C42:3 | 1014.0                                     | 369.4                                                     |
| C43:3 | 1028.0                                     | 369.4                                                     |
| C44:3 | 1042.0                                     | 369.4                                                     |
| C45:3 | 1056.0                                     | 369.4                                                     |
| C46:3 | 1070.1                                     | 369.4                                                     |
| C47:3 | 1084.1                                     | 369.4                                                     |
| C48:3 | 1098.1                                     | 369.4                                                     |
| C49:3 | 1112.1                                     | 369.4                                                     |
| C50:3 | 1126.1                                     | 369.4                                                     |
| C51:3 | 1140.1                                     | 369.4                                                     |
| C52:3 | 1154.1                                     | 369.4                                                     |
| C53:3 | 1168.2                                     | 369.4                                                     |
| C54:3 | 1182.2                                     | 369.4                                                     |
| C32:2 | 875.8                                      | 369.4                                                     |
| C33:2 | 889.9                                      | 369.4                                                     |
| C34:2 | 903.9                                      | 369.4                                                     |
| C35:2 | 917.9                                      | 369.4                                                     |
| C36:2 | 931.9                                      | 369.4                                                     |
| C37:2 | 945.9                                      | 369.4                                                     |
| C38:2 | 959.9                                      | 369.4                                                     |
| C39:2 | 974.0                                      | 369.4                                                     |

|       |        |       |
|-------|--------|-------|
| C40:2 | 988.0  | 369.4 |
| C41:2 | 1002.0 | 369.4 |
| C42:2 | 1016.0 | 369.4 |
| C43:2 | 1030.0 | 369.4 |
| C44:2 | 1044.0 | 369.4 |
| C45:2 | 1058.1 | 369.4 |
| C46:2 | 1072.1 | 369.4 |
| C47:2 | 1086.1 | 369.4 |
| C48:2 | 1100.1 | 369.4 |
| C49:2 | 1114.1 | 369.4 |
| C50:2 | 1128.1 | 369.4 |
| C51:2 | 1142.1 | 369.4 |
| C52:2 | 1156.2 | 369.4 |
| C53:2 | 1170.2 | 369.4 |
| C54:2 | 1184.2 | 369.4 |

---

**Table S15. Selected *m/z* values for CEs in MS/MS analysis. Related to Figure 8C.**

| FA    | Precursor ion (Q1)   | Product ion (Q3)                      |
|-------|----------------------|---------------------------------------|
|       | [M + H] <sup>+</sup> | [ChI – H <sub>2</sub> O] <sup>+</sup> |
| C16:1 | 623.6                | 369.4                                 |
| C17:1 | 637.6                | 369.4                                 |
| C18:1 | 651.6                | 369.4                                 |
| C19:1 | 665.6                | 369.4                                 |
| C20:1 | 679.7                | 369.4                                 |
| C21:1 | 693.7                | 369.4                                 |
| C22:1 | 707.7                | 369.4                                 |
| C23:1 | 721.7                | 369.4                                 |
| C24:1 | 735.7                | 369.4                                 |
| C25:1 | 749.7                | 369.4                                 |
| C26:1 | 763.7                | 369.4                                 |
| C27:1 | 777.8                | 369.4                                 |
| C28:1 | 791.8                | 369.4                                 |
| C29:1 | 805.8                | 369.4                                 |
| C30:1 | 819.8                | 369.4                                 |
| C31:1 | 833.8                | 369.4                                 |
| C32:1 | 847.8                | 369.4                                 |
| C33:1 | 861.9                | 369.4                                 |
| C34:1 | 875.9                | 369.4                                 |
| C35:1 | 889.9                | 369.4                                 |
| C36:1 | 903.9                | 369.4                                 |
| C16:0 | 625.6                | 369.4                                 |
| C17:0 | 639.6                | 369.4                                 |
| C18:0 | 653.6                | 369.4                                 |
| C19:0 | 667.7                | 369.4                                 |
| C20:0 | 681.7                | 369.4                                 |
| C21:0 | 695.7                | 369.4                                 |
| C22:0 | 709.7                | 369.4                                 |
| C23:0 | 723.7                | 369.4                                 |
| C24:0 | 737.7                | 369.4                                 |
| C25:0 | 751.7                | 369.4                                 |



|       |       |       |
|-------|-------|-------|
| C26:0 | 765.8 | 369.4 |
| C27:0 | 779.8 | 369.4 |
| C28:0 | 793.8 | 369.4 |
| C29:0 | 807.8 | 369.4 |
| C30:0 | 821.8 | 369.4 |
| C31:0 | 835.8 | 369.4 |
| C32:0 | 849.9 | 369.4 |
| C33:0 | 863.9 | 369.4 |
| C34:0 | 877.9 | 369.4 |
| C35:0 | 891.9 | 369.4 |
| C36:0 | 905.9 | 369.4 |

---
